# Supplementary material for: Construction and application of α-Fe2O3 nanocubes dominated by the composite interaction between polyvinyl chloride and potassium ferrocyanide
Source: Royal Society of Chemistry journal article supplement (doi:10.1039/c4ta01498g), 2014-01-01
Supplement: c4ta01498g1.pdf [file c4ta01498g1.pdf]

## Supporting Information

### Construction and Application of $\alpha$ -Fe<sub>2</sub>O<sub>3</sub> Nanocubes Dominated by the Composite Interaction between Polyvinyl Chloride and Potassium Ferrocyanide

Pu Du<sup>a</sup>, Le Xin Song<sup>\*a,b</sup>, Juan Xia<sup>\*b</sup>, Yue Teng<sup>b</sup> and Zheng Kun Yang<sup>a</sup>

<sup>a</sup>Department of Chemistry, University of Science and Technology of China, Jin Zhai Road 96, Hefei 230026, China

<sup>b</sup>CAS Key Laboratory of Materials for Energy Conversion, Department of Materials Science and Engineering, University of Science and Technology of China, Jin Zhai Road 96, Hefei 230026, China

[solexin@ustc.edu.cn](mailto:solexin@ustc.edu.cn) [xiajuan@mail.ustc.edu.cn](mailto:xiajuan@mail.ustc.edu.cn)

#### A list of the contents for all the Supporting Information

| Pages | Contents                                                                                                                                                                                     |
|-------|----------------------------------------------------------------------------------------------------------------------------------------------------------------------------------------------|
| 1     | A table of contents page.                                                                                                                                                                    |
| 2     | <b>Fig. S1</b> XRD pattern of the $\alpha$ -Fe <sub>2</sub> O <sub>3</sub> nanoparticles obtained by sintering PF at 800 K for 8 h.                                                          |
| 3     | <b>Fig. S2</b> FE-SEM image of the $\alpha$ -Fe <sub>2</sub> O <sub>3</sub> nanoparticles obtained by sintering PF at 800 K for 8 h.                                                         |
| 4     | <b>Fig. S3</b> XRD patterns of the $\alpha$ -Fe <sub>2</sub> O <sub>3</sub> nanoparticles obtained by sintering PVC/PF-10 (a) and PVC/PF-50 (b) at 800 K for 8 h.                            |
| 5     | <b>Fig. S4</b> FE-SEM images of the $\alpha$ -Fe <sub>2</sub> O <sub>3</sub> nanoparticles obtained by sintering PVC/PF-10 (a) and PVC/PF-50 (b) at 800 K for 8 h.                           |
| 6     | <b>Fig. S5</b> XRD pattern of the $\alpha$ -Fe <sub>2</sub> O <sub>3</sub> nanoparticles and carbon obtained by sintering PVC/PF-20 in a sealed muffle furnace environment at 500 K for 1 h. |
| 7     | <b>Fig. S6</b> Raman spectra of the $\alpha$ -Fe <sub>2</sub> O <sub>3</sub> nanomaterials obtained at 500, 550, 600, 700 and 800 K for 1 h.                                                 |
| 8     | <b>Fig. S7</b> The XRD pattern and SEM image of the $\alpha$ -Fe <sub>2</sub> O <sub>3</sub> obtained by sintering the PVC/PF-20 at 900 K for 1 h.                                           |
| 9     | <b>Fig. S8</b> FE-SEM image of the $\alpha$ -Fe <sub>2</sub> O <sub>3</sub> nanoparticles obtained by sintering free PF at 600 K for 1 h.                                                    |
| 10    | <b>Fig. S9</b> DSC (A) and DMA (B) curves of the PVC/PF-20 at the temperature from 335~380 K.                                                                                                |
| 11    | <b>Fig. S10</b> TG curves of free PVC and the PVC/PF-20 under nitrogen atmosphere.                                                                                                           |
| 12    | <b>Fig. S11</b> The TG curve of the PVC/PF-20 under air.                                                                                                                                     |
| 13    | <b>Fig. S12</b> N <sub>2</sub> adsorption-desorption isotherms of the $\alpha$ -Fe <sub>2</sub> O <sub>3</sub> nanocubes (A) and nanoparticles (B).                                          |

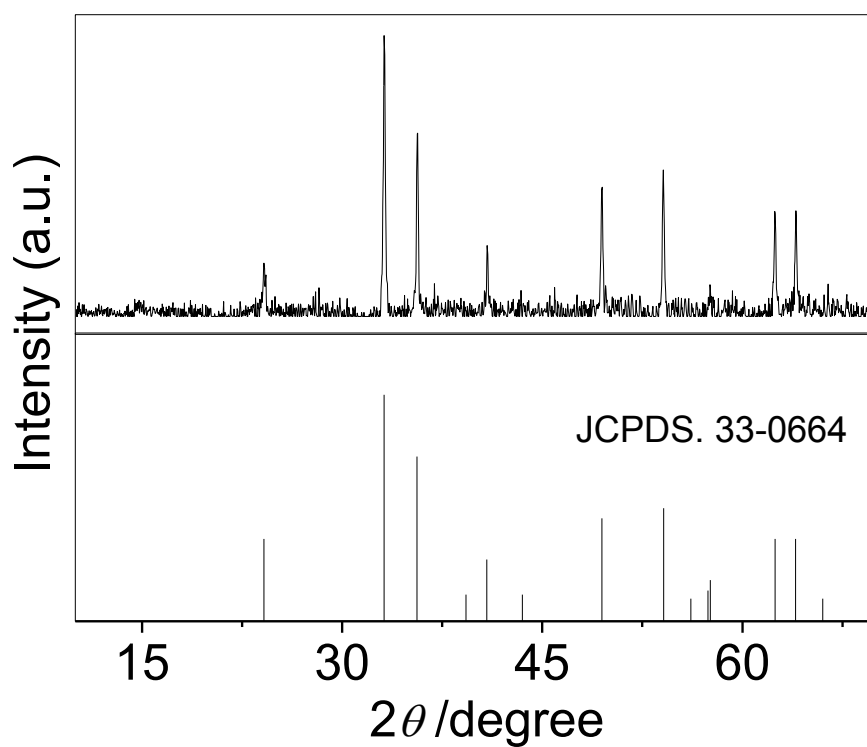

**Fig. S1** XRD pattern of the  $\alpha$ -Fe<sub>2</sub>O<sub>3</sub> nanoparticles obtained by sintering PF at 800 K for 8 h.

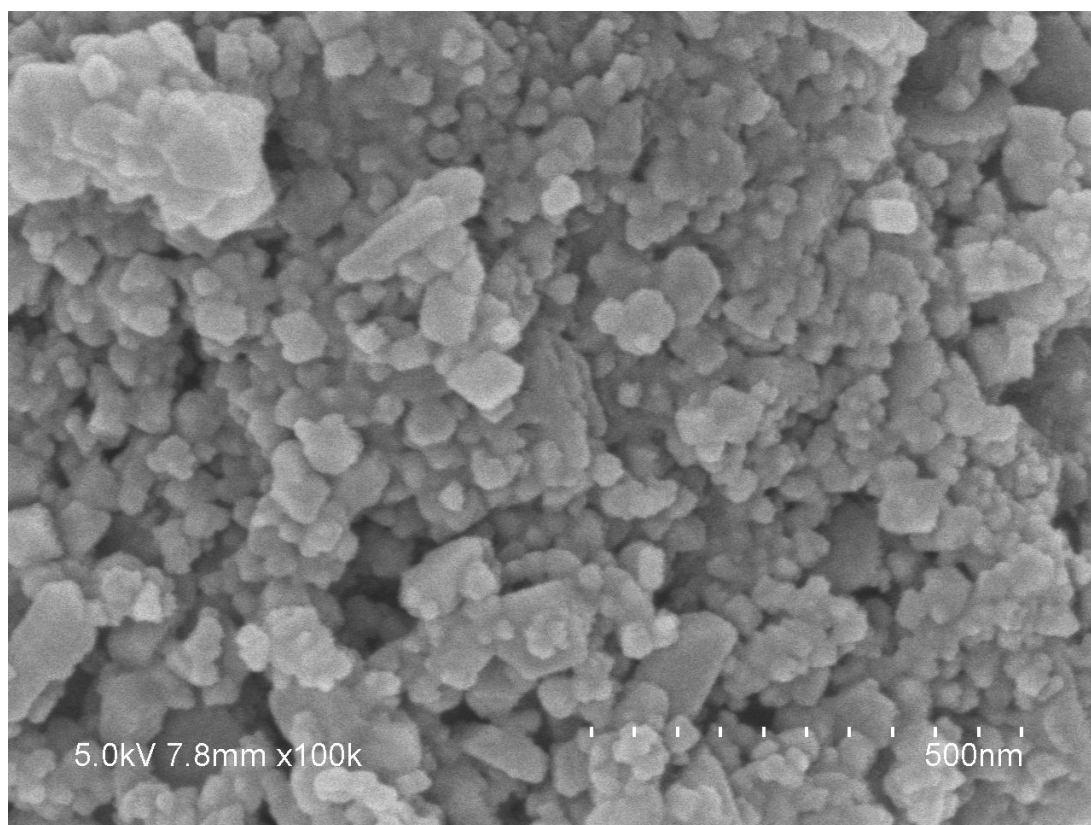

**Fig. S2** FE-SEM image of the  $\alpha$ -Fe<sub>2</sub>O<sub>3</sub> nanoparticles obtained by sintering PF at 800 K for 8 h.

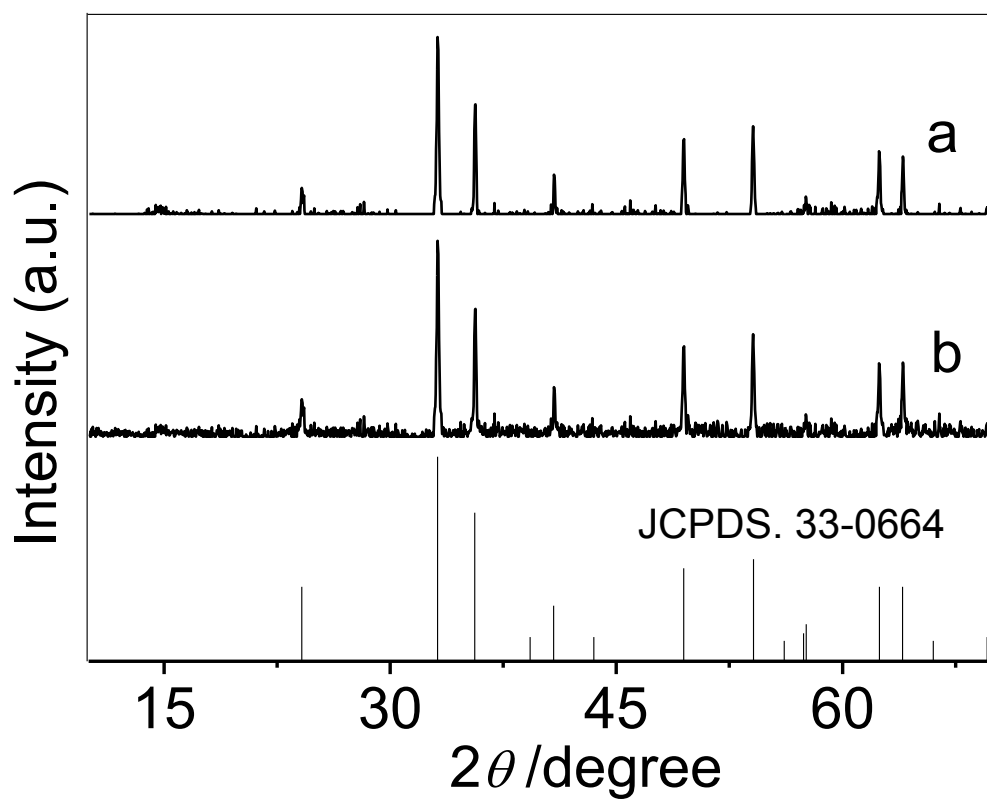

**Fig. S3** XRD patterns of the  $\alpha$ -Fe<sub>2</sub>O<sub>3</sub> nanoparticles obtained by sintering PVC/PF-10 (a) and PVC/PF-50 (b) at 800 K for 8 h.

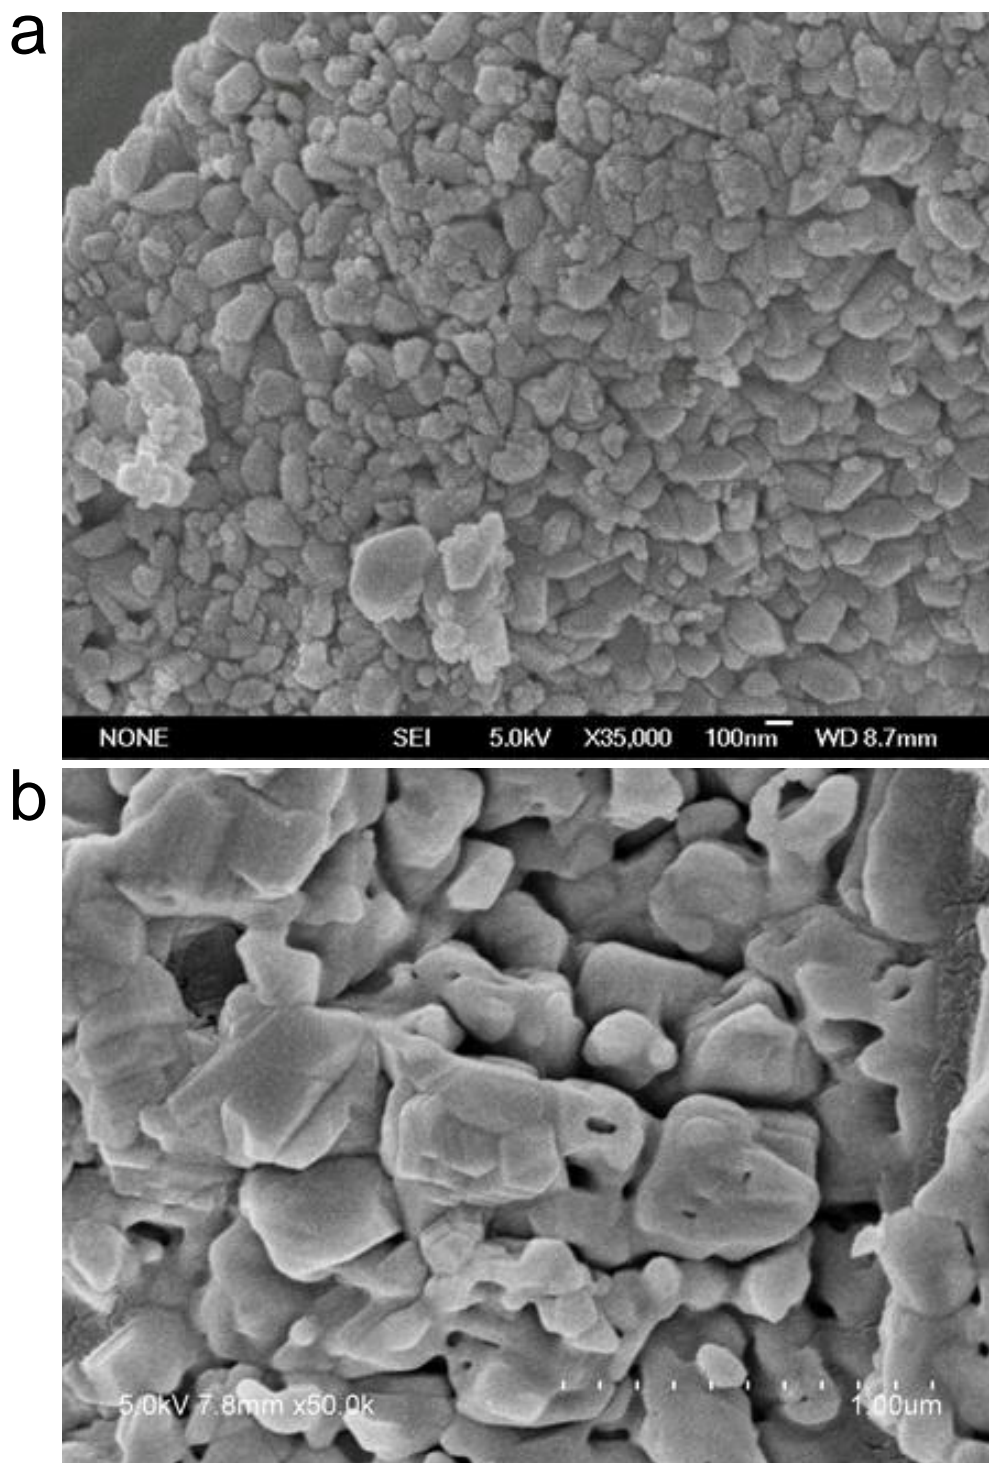

**Fig. S4** FE-SEM images of the  $\alpha$ -Fe<sub>2</sub>O<sub>3</sub> nanoparticles obtained by sintering PVC/PF-10 (a) and PVC/PF-50 (b) at 800 K for 8 h.

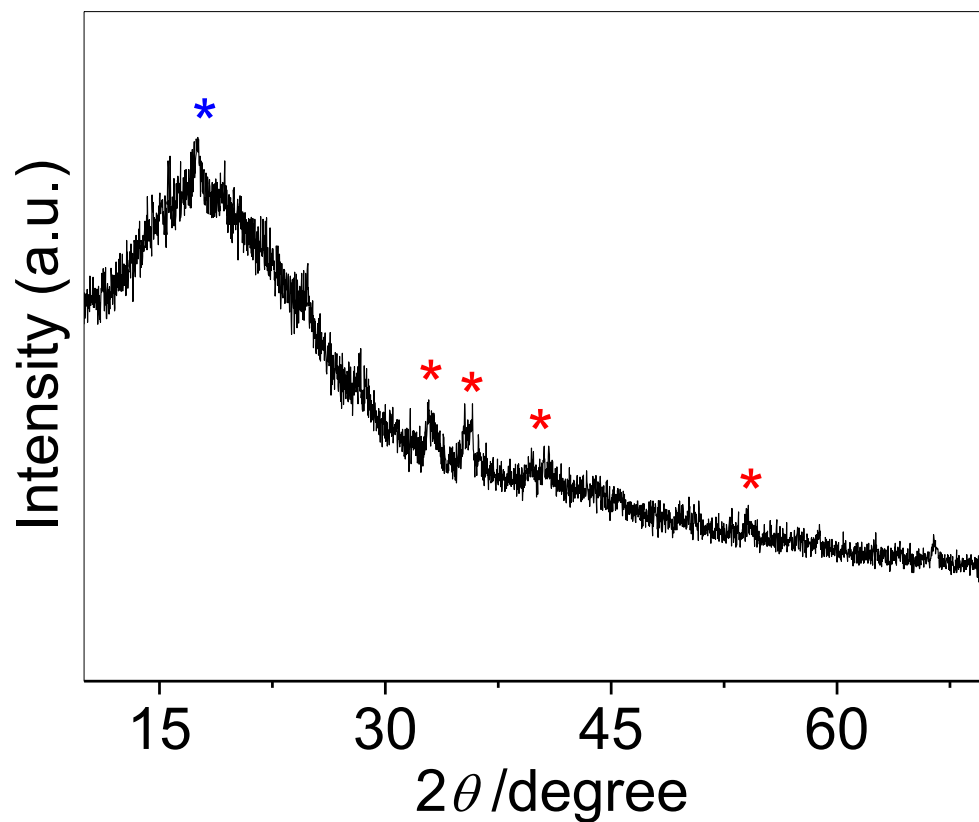

**Fig. S5** XRD pattern of the  $\alpha$ -Fe<sub>2</sub>O<sub>3</sub> nanoparticles and carbon obtained by sintering PVC/PF-20 in a sealed muffle furnace environment at 500 K for 1 h (the blue asterisk denotes the peak of carbon and the red asterisks denote the peaks of  $\alpha$ -Fe<sub>2</sub>O<sub>3</sub> nanoparticles).

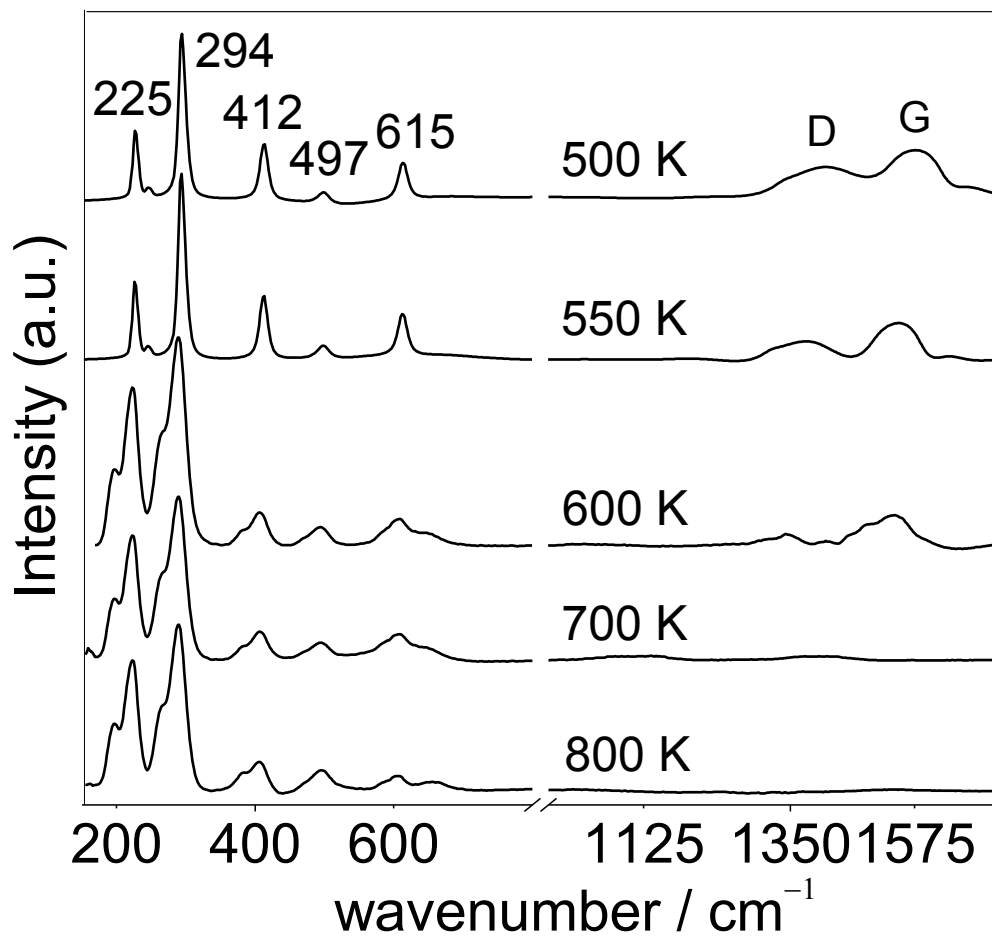

**Fig. S6** Raman spectra of the  $\alpha$ -Fe<sub>2</sub>O<sub>3</sub> nanomaterials obtained at 500, 550, 600, 700 and 800 K for 1 h.

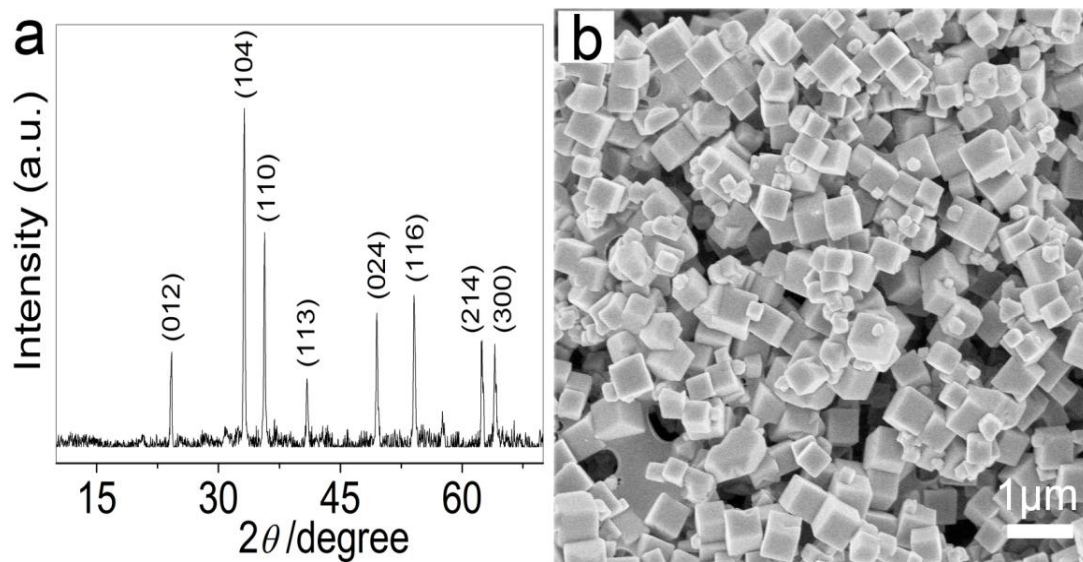

**Fig. S7** The XRD pattern and SEM image of the  $\alpha\text{-Fe}_2\text{O}_3$  obtained by sintering the PVC/PF-20 at 900 K for 1 h.



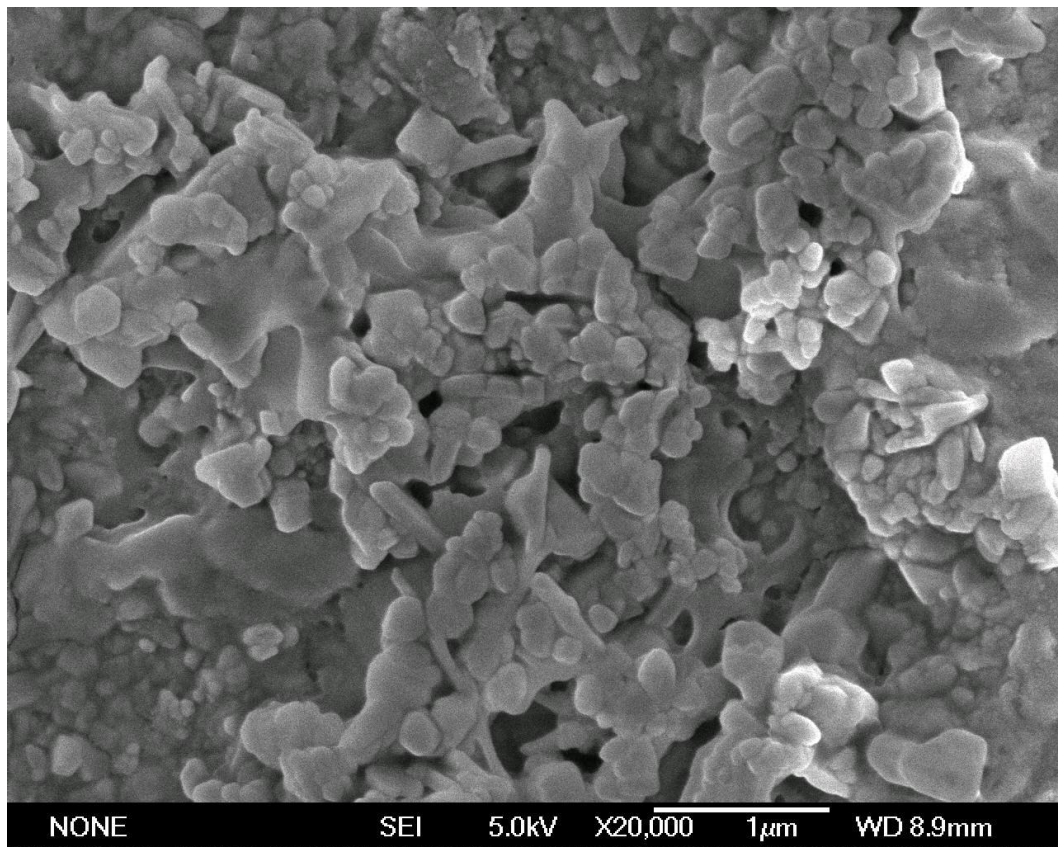

**Fig. S8** FE-SEM image of the  $\alpha$ -Fe<sub>2</sub>O<sub>3</sub> nanoparticles obtained by sintering free PF at 600 K for 1 h.

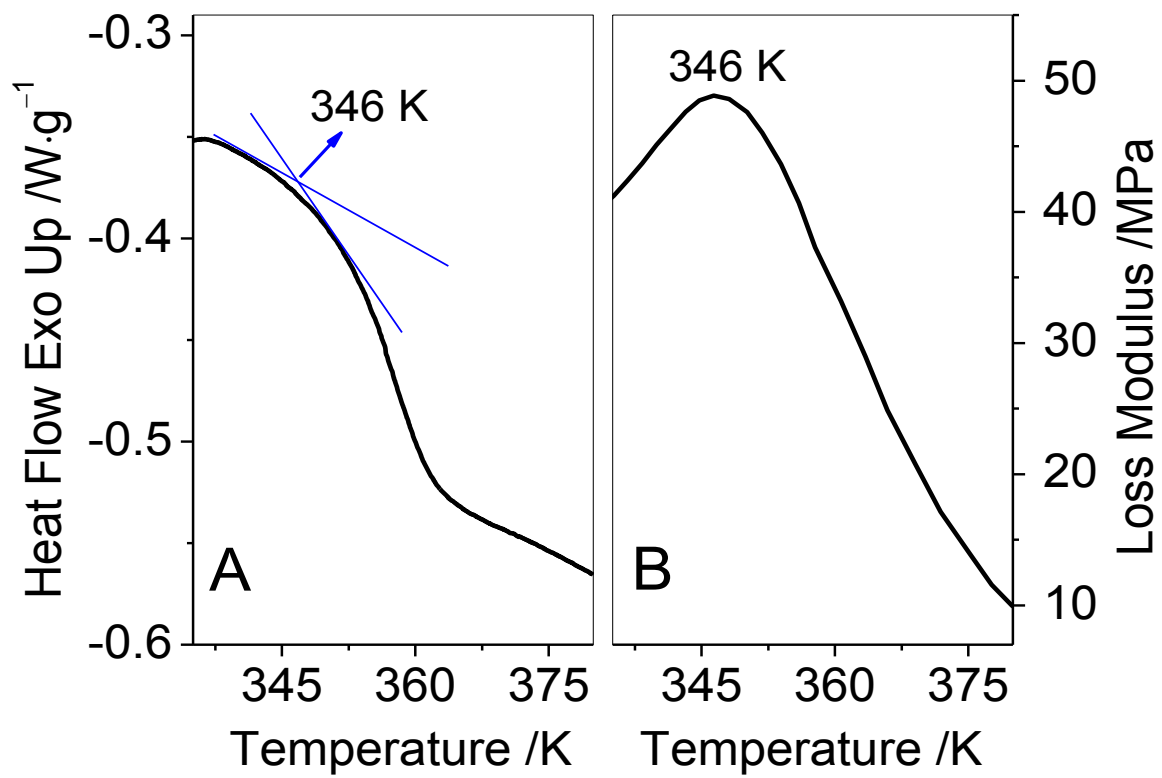

**Fig. S9** DSC (A) and DMA (B) curves of the PVC/PF-20 at the temperature from 335~380 K.

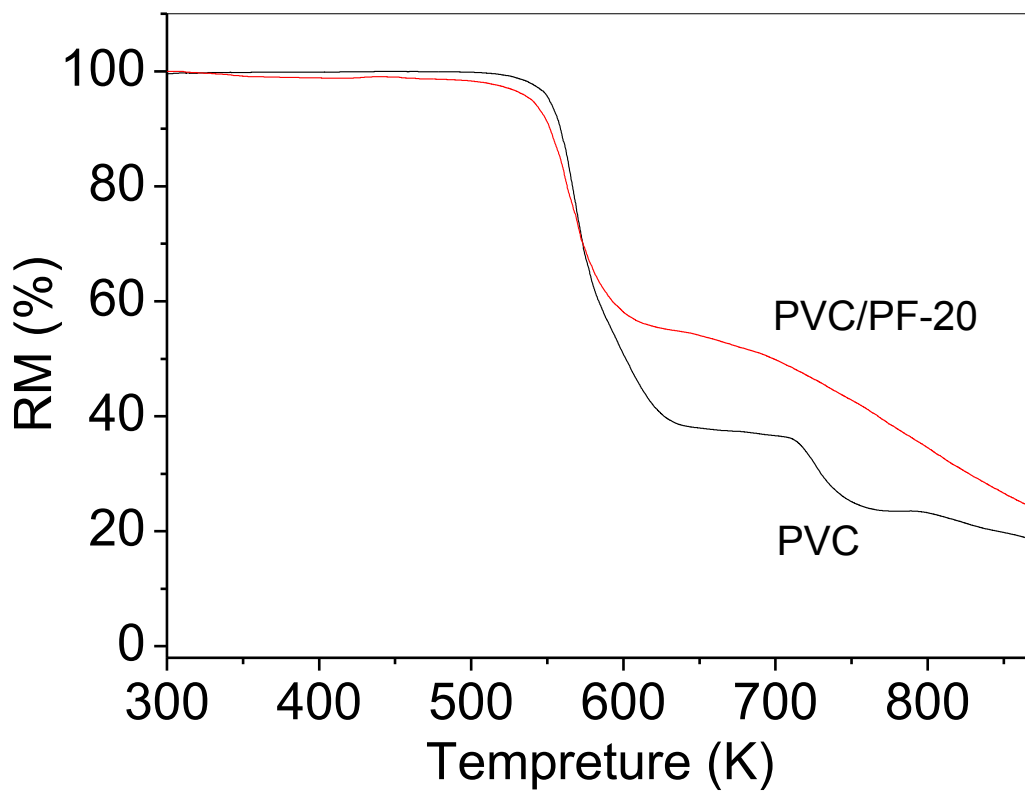

**Fig. S10** TG curves of free PVC and the PVC/PF-20 under nitrogen atmosphere.

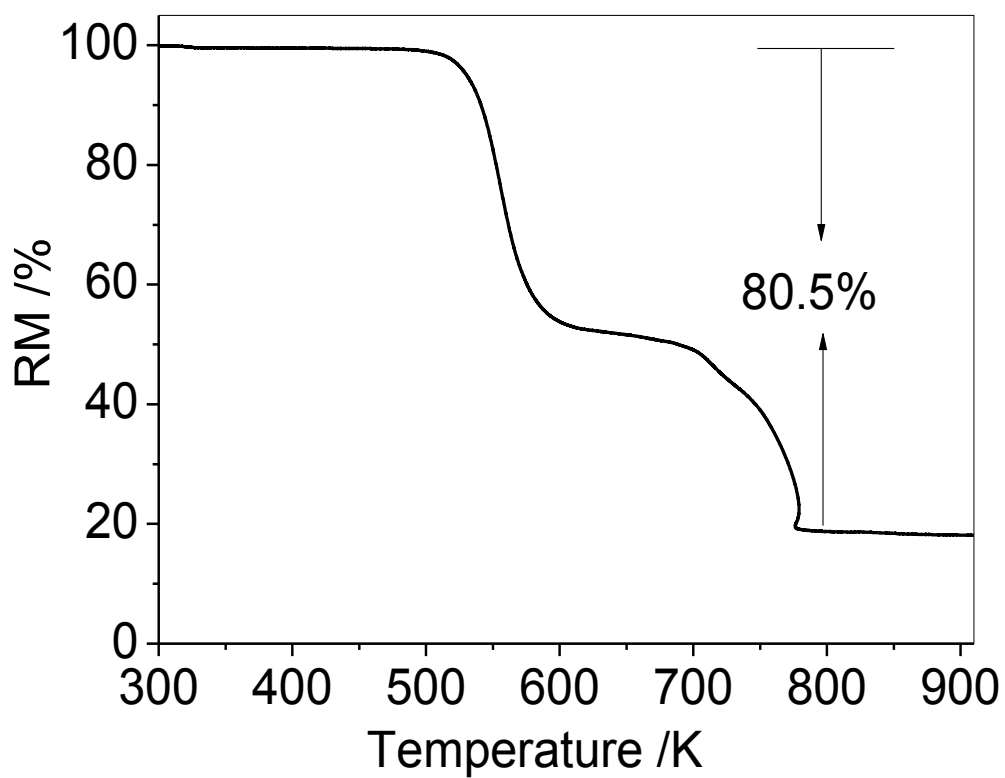

**Fig. S11** The TG curve of the PVC/PF-20 under air.

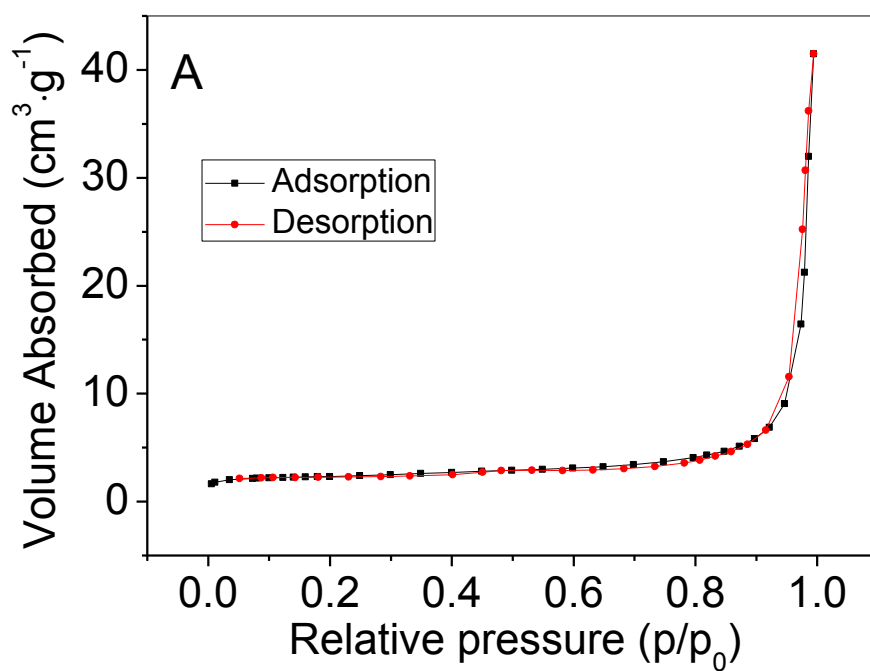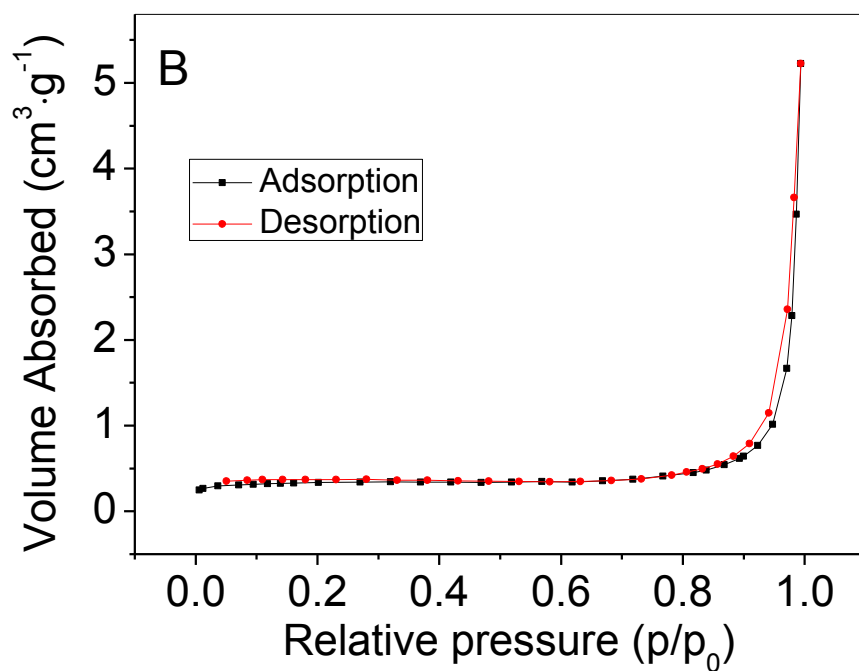

**Fig. S12**  $\text{N}_2$  adsorption-desorption isotherm of the  $\alpha\text{-Fe}_2\text{O}_3$  nanocubes (A) and nanoparticles (B).
